# Supplementary material for: Similarity-Based Method with Multiple-Feature Sampling for Predicting Drug Side Effects
Source: Hindawi journal article supplement (doi:10.1155/2022/9547317), 2022-04-01
Supplement: f1 [file 9547317.f1.pdf]

**Table S1.** Performance of SVM (polynomial kernel) classifier with discrete strategy.

| <b>Feature sampling</b> | <b>SN</b> | <b>SP</b> | <b>ACC</b> | <b>MCC</b> | <b>Precision</b> | <b>F1 measure</b> |
|-------------------------|-----------|-----------|------------|------------|------------------|-------------------|
| Top (single sampling)   | 0.5860    | 0.7113    | 0.6487     | 0.2997     | 0.6700           | 0.6252            |
| Top+5%                  | 0.4956    | 0.8685    | 0.6821     | 0.3924     | 0.7903           | 0.6092            |
| Top+5%+10%              | 0.5095    | 0.8775    | 0.6935     | 0.4162     | 0.8061           | 0.6242            |
| Top+5%+10%+15%          | 0.5210    | 0.8747    | 0.6979     | 0.4230     | 0.8059           | 0.6328            |
| Top+5%+10%+15%+20%      | 0.5257    | 0.8721    | 0.6989     | 0.4240     | 0.8041           | 0.6357            |

**Table S2.** Performance of SVM (polynomial kernel) classifier with continuous strategy.

| <b>Feature sampling</b> | <b>SN</b> | <b>SP</b> | <b>ACC</b> | <b>MCC</b> | <b>Precision</b> | <b>F1 measure</b> |
|-------------------------|-----------|-----------|------------|------------|------------------|-------------------|
| Top 10%                 | 0.8446    | 0.9037    | 0.8742     | 0.7496     | 0.8977           | 0.8703            |
| Top 20%                 | 0.8606    | 0.9698    | 0.9152     | 0.8356     | 0.9661           | 0.9101            |
| Top 30%                 | 0.8606    | 0.9698    | 0.9152     | 0.8356     | 0.9661           | 0.9101            |
| Top 40%                 | 0.8606    | 0.9698    | 0.9152     | 0.8355     | 0.9661           | 0.9101            |

**Table S3.** Performance of SVM (RBF kernel) classifier with discrete strategy.

| <b>Feature sampling</b> | <b>SN</b> | <b>SP</b> | <b>ACC</b> | <b>MCC</b> | <b>Precision</b> | <b>F1 measure</b> |
|-------------------------|-----------|-----------|------------|------------|------------------|-------------------|
| Top (single sampling)   | 0.5656    | 0.7560    | 0.6608     | 0.3276     | 0.6986           | 0.6251            |
| Top+5%                  | 0.5181    | 0.8225    | 0.6703     | 0.3576     | 0.7448           | 0.6111            |
| Top+5%+10%              | 0.5288    | 0.8488    | 0.6888     | 0.3984     | 0.7770           | 0.6290            |
| Top+5%+10%+15%          | 0.5406    | 0.8569    | 0.6987     | 0.4188     | 0.7899           | 0.6415            |
| Top+5%+10%+15%+20%      | 0.5228    | 0.8555    | 0.6892     | 0.4012     | 0.7835           | 0.6271            |

**Table S4.** Performance of SVM (RBF kernel) classifier with continuous strategy.

| <b>Feature sampling</b> | <b>SN</b> | <b>SP</b> | <b>ACC</b> | <b>MCC</b> | <b>Precision</b> | <b>F1 measure</b> |
|-------------------------|-----------|-----------|------------|------------|------------------|-------------------|
| Top 10%                 | 0.8263    | 0.9483    | 0.8873     | 0.7804     | 0.9411           | 0.8800            |
| Top 20%                 | 0.8679    | 0.9703    | 0.9191     | 0.8428     | 0.9669           | 0.9147            |
| Top 30%                 | 0.8679    | 0.9703    | 0.9191     | 0.8427     | 0.9669           | 0.9147            |
| Top 40%                 | 0.8679    | 0.9703    | 0.9191     | 0.8427     | 0.9669           | 0.9147            |

**Table S5.** Performance of Adaboost M1 classifier with discrete strategy.

| <b>Feature sampling</b> | <b>SN</b> | <b>SP</b> | <b>ACC</b> | <b>MCC</b> | <b>Precision</b> | <b>F1 measure</b> |
|-------------------------|-----------|-----------|------------|------------|------------------|-------------------|
| Top (single sampling)   | 0.5860    | 0.7526    | 0.6693     | 0.3435     | 0.7032           | 0.6392            |
| Top+5%                  | 0.5801    | 0.7347    | 0.6574     | 0.3186     | 0.6863           | 0.6287            |
| Top+5%+10%              | 0.5768    | 0.7356    | 0.6562     | 0.3165     | 0.6858           | 0.6266            |
| Top+5%+10%+15%          | 0.5809    | 0.7278    | 0.6544     | 0.3121     | 0.6809           | 0.6270            |
| Top+5%+10%+15%+20%      | 0.5809    | 0.7278    | 0.6544     | 0.3121     | 0.6809           | 0.6270            |

**Table S6.** Performance of Adaboost M1 classifier with continuous strategy.

| <b>Feature sampling</b> | <b>SN</b> | <b>SP</b> | <b>ACC</b> | <b>MCC</b> | <b>Precision</b> | <b>F1 measure</b> |
|-------------------------|-----------|-----------|------------|------------|------------------|-------------------|
| Top 10%                 | 0.6993    | 0.9677    | 0.8335     | 0.6932     | 0.9567           | 0.8068            |
| Top 20%                 | 0.8466    | 0.9581    | 0.9024     | 0.8102     | 0.9529           | 0.8963            |
| Top 30%                 | 0.8466    | 0.9581    | 0.9024     | 0.8102     | 0.9529           | 0.8963            |
| Top 40%                 | 0.8466    | 0.9581    | 0.9024     | 0.8102     | 0.9529           | 0.8963            |

**Table S7.** Performance of Bagging classifier with discrete strategy.

| <b>Feature sampling</b> | <b>SN</b> | <b>SP</b> | <b>ACC</b> | <b>MCC</b> | <b>Precision</b> | <b>F1 measure</b> |
|-------------------------|-----------|-----------|------------|------------|------------------|-------------------|
| Top (single sampling)   | 0.7626    | 0.8192    | 0.7909     | 0.5828     | 0.8084           | 0.7848            |
| Top+5%                  | 0.7908    | 0.8703    | 0.8305     | 0.6632     | 0.8591           | 0.8235            |
| Top+5%+10%              | 0.8006    | 0.8725    | 0.8366     | 0.6757     | 0.8626           | 0.8299            |
| Top+5%+10%+15%          | 0.8012    | 0.8759    | 0.8386     | 0.6799     | 0.8659           | 0.8317            |
| Top+5%+10%+15%+20%      | 0.8018    | 0.8749    | 0.8384     | 0.6793     | 0.8650           | 0.8316            |

**Table S8.** Performance of Bagging classifier with continuous strategy.

| <b>Feature sampling</b> | <b>SN</b> | <b>SP</b> | <b>ACC</b> | <b>MCC</b> | <b>Precision</b> | <b>F1 measure</b> |
|-------------------------|-----------|-----------|------------|------------|------------------|-------------------|
| Top 10%                 | 0.8707    | 0.9561    | 0.9134     | 0.8298     | 0.9520           | 0.9095            |
| Top 20%                 | 0.8845    | 0.9702    | 0.9273     | 0.8580     | 0.9674           | 0.9240            |
| Top 30%                 | 0.8845    | 0.9702    | 0.9273     | 0.8580     | 0.9674           | 0.9240            |
| Top 40%                 | 0.8843    | 0.9701    | 0.9272     | 0.8576     | 0.9673           | 0.9238            |

**Table S9.** Performance of Bayesian network classifier with discrete strategy.

| <b>Feature sampling</b> | <b>SN</b> | <b>SP</b> | <b>ACC</b> | <b>MCC</b> | <b>Precision</b> | <b>F1 measure</b> |
|-------------------------|-----------|-----------|------------|------------|------------------|-------------------|
| Top (single sampling)   | 0.6137    | 0.7877    | 0.7007     | 0.4076     | 0.7430           | 0.6722            |
| Top+5%                  | 0.5959    | 0.7941    | 0.6950     | 0.3980     | 0.7433           | 0.6614            |
| Top+5%+10%              | 0.5879    | 0.7987    | 0.6933     | 0.3955     | 0.7449           | 0.6571            |
| Top+5%+10%+15%          | 0.5838    | 0.7995    | 0.6916     | 0.3925     | 0.7443           | 0.6543            |
| Top+5%+10%+15%+20%      | 0.5819    | 0.7965    | 0.6892     | 0.3875     | 0.7409           | 0.6518            |

**Table S10.** Performance of Bayesian network classifier with continuous strategy.

| <b>Feature sampling</b> | <b>SN</b> | <b>SP</b> | <b>ACC</b> | <b>MCC</b> | <b>Precision</b> | <b>F1 measure</b> |
|-------------------------|-----------|-----------|------------|------------|------------------|-------------------|
| Top 10%                 | 0.7433    | 0.9291    | 0.8362     | 0.6844     | 0.9130           | 0.8194            |
| Top 20%                 | 0.7076    | 0.9871    | 0.8473     | 0.7236     | 0.9821           | 0.8225            |
| Top 30%                 | 0.6911    | 0.9959    | 0.8435     | 0.7214     | 0.9941           | 0.8153            |
| Top 40%                 | 0.6847    | 0.9977    | 0.8412     | 0.7186     | 0.9967           | 0.8117            |

**Table S11.** Performance of Naive Bayes classifier with discrete strategy.

| <b>Feature sampling</b> | <b>SN</b> | <b>SP</b> | <b>ACC</b> | <b>MCC</b> | <b>Precision</b> | <b>F1 measure</b> |
|-------------------------|-----------|-----------|------------|------------|------------------|-------------------|
| Top (single sampling)   | 0.5138    | 0.7597    | 0.6368     | 0.2822     | 0.6814           | 0.5859            |
| Top+5%                  | 0.5111    | 0.7433    | 0.6272     | 0.2616     | 0.6657           | 0.5782            |
| Top+5%+10%              | 0.5016    | 0.7499    | 0.6257     | 0.2596     | 0.6673           | 0.5727            |
| Top+5%+10%+15%          | 0.4875    | 0.7612    | 0.6244     | 0.2586     | 0.6713           | 0.5648            |
| Top+5%+10%+15%+20%      | 0.4701    | 0.7710    | 0.6205     | 0.2528     | 0.6725           | 0.5534            |

**Table S12.** Performance of Naive Bayes classifier with continuous strategy.

| <b>Feature sampling</b> | <b>SN</b> | <b>SP</b> | <b>ACC</b> | <b>MCC</b> | <b>Precision</b> | <b>F1 measure</b> |
|-------------------------|-----------|-----------|------------|------------|------------------|-------------------|
| Top 10%                 | 0.5311    | 0.9518    | 0.7415     | 0.5323     | 0.9168           | 0.6726            |
| Top 20%                 | 0.7173    | 0.9882    | 0.8528     | 0.7329     | 0.9837           | 0.8296            |
| Top 30%                 | 0.7127    | 0.9906    | 0.8516     | 0.7322     | 0.9869           | 0.8276            |
| Top 40%                 | 0.7122    | 0.9907    | 0.8514     | 0.7319     | 0.9871           | 0.8273            |

**Table S13.** Performance of KNN classifier with discrete strategy.

| <b>Feature sampling</b> | <b>SN</b> | <b>SP</b> | <b>ACC</b> | <b>MCC</b> | <b>Precision</b> | <b>F1 measure</b> |
|-------------------------|-----------|-----------|------------|------------|------------------|-------------------|
| Top (single sampling)   | 0.8039    | 0.7266    | 0.7652     | 0.5321     | 0.7462           | 0.7740            |
| Top+5%                  | 0.7776    | 0.7666    | 0.7721     | 0.5443     | 0.7692           | 0.7734            |
| Top+5%+10%              | 0.7878    | 0.7870    | 0.7874     | 0.5749     | 0.7867           | 0.7871            |
| Top+5%+10%+15%          | 0.7933    | 0.7863    | 0.7898     | 0.5797     | 0.7875           | 0.7903            |
| Top+5%+10%+15%+20%      | 0.7987    | 0.7850    | 0.7918     | 0.5838     | 0.7876           | 0.7931            |

**Table S14.** Performance of KNN classifier with continuous strategy.

| <b>Feature sampling</b> | <b>SN</b> | <b>SP</b> | <b>ACC</b> | <b>MCC</b> | <b>Precision</b> | <b>F1 measure</b> |
|-------------------------|-----------|-----------|------------|------------|------------------|-------------------|
| Top 10%                 | 0.8753    | 0.9027    | 0.8890     | 0.7782     | 0.9000           | 0.8874            |
| Top 20%                 | 0.8890    | 0.9253    | 0.9071     | 0.8148     | 0.9224           | 0.9054            |
| Top 30%                 | 0.8890    | 0.9253    | 0.9071     | 0.8148     | 0.9224           | 0.9054            |
| Top 40%                 | 0.8890    | 0.9253    | 0.9071     | 0.8148     | 0.9224           | 0.9054            |

**Table S15.** Performance of decision tree classifier with discrete strategy.

| <b>Feature sampling</b> | <b>SN</b> | <b>SP</b> | <b>ACC</b> | <b>MCC</b> | <b>Precision</b> | <b>F1 measure</b> |
|-------------------------|-----------|-----------|------------|------------|------------------|-------------------|
| Top (single sampling)   | 0.6988    | 0.8282    | 0.7635     | 0.5315     | 0.8027           | 0.7471            |
| Top+5%                  | 0.7479    | 0.8529    | 0.8004     | 0.6041     | 0.8357           | 0.7893            |
| Top+5%+10%              | 0.7684    | 0.8547    | 0.8116     | 0.6259     | 0.8407           | 0.8025            |
| Top+5%+10%+15%          | 0.7709    | 0.8549    | 0.8129     | 0.6284     | 0.8413           | 0.8042            |
| Top+5%+10%+15%+20%      | 0.7825    | 0.8483    | 0.8154     | 0.6333     | 0.8372           | 0.8080            |

**Table S16.** Performance of decision tree classifier with continuous strategy.

| <b>Feature sampling</b> | <b>SN</b> | <b>SP</b> | <b>ACC</b> | <b>MCC</b> | <b>Precision</b> | <b>F1 measure</b> |
|-------------------------|-----------|-----------|------------|------------|------------------|-------------------|
| Top 10%                 | 0.8686    | 0.9285    | 0.8986     | 0.7986     | 0.9241           | 0.8955            |
| Top 20%                 | 0.8847    | 0.9492    | 0.9169     | 0.8357     | 0.9458           | 0.9141            |
| Top 30%                 | 0.8848    | 0.9492    | 0.9170     | 0.8359     | 0.9458           | 0.9142            |
| Top 40%                 | 0.8848    | 0.9492    | 0.9170     | 0.8359     | 0.9458           | 0.9142            |



**Table S17.** Performance of PART classifier with discrete strategy.

| <b>Feature sampling</b> | <b>SN</b> | <b>SP</b> | <b>ACC</b> | <b>MCC</b> | <b>Precision</b> | <b>F1 measure</b> |
|-------------------------|-----------|-----------|------------|------------|------------------|-------------------|
| Top (single sampling)   | 0.6272    | 0.7700    | 0.6986     | 0.4015     | 0.7320           | 0.6753            |
| Top+5%                  | 0.6986    | 0.8395    | 0.7690     | 0.5442     | 0.8143           | 0.7515            |
| Top+5%+10%              | 0.7473    | 0.8366    | 0.7920     | 0.5882     | 0.8214           | 0.7810            |
| Top+5%+10%+15%          | 0.7526    | 0.8443    | 0.7985     | 0.5996     | 0.8285           | 0.7886            |
| Top+5%+10%+15%+20%      | 0.7351    | 0.8694    | 0.8022     | 0.6105     | 0.8492           | 0.7874            |

**Table S18.** Performance of PART classifier with continuous strategy.

| <b>Feature sampling</b> | <b>SN</b> | <b>SP</b> | <b>ACC</b> | <b>MCC</b> | <b>Precision</b> | <b>F1 measure</b> |
|-------------------------|-----------|-----------|------------|------------|------------------|-------------------|
| Top 10%                 | 0.8163    | 0.9272    | 0.8718     | 0.7491     | 0.9157           | 0.8615            |
| Top 20%                 | 0.8864    | 0.9515    | 0.9190     | 0.8399     | 0.9482           | 0.9162            |
| Top 30%                 | 0.8883    | 0.9502    | 0.9192     | 0.8402     | 0.9469           | 0.9166            |
| Top 40%                 | 0.8866    | 0.9515    | 0.9190     | 0.8399     | 0.9481           | 0.9163            |

**Table S19.** Performance of logistic regression classifier with discrete strategy.

| <b>Feature sampling</b> | <b>SN</b> | <b>SP</b> | <b>ACC</b> | <b>MCC</b> | <b>Precision</b> | <b>F1 measure</b> |
|-------------------------|-----------|-----------|------------|------------|------------------|-------------------|
| Top (single sampling)   | 0.6174    | 0.6828    | 0.6501     | 0.3008     | 0.6606           | 0.6383            |
| Top+5%                  | 0.6986    | 0.8395    | 0.7690     | 0.5442     | 0.8143           | 0.7515            |
| Top+5%+10%              | 0.5886    | 0.8210    | 0.7048     | 0.4209     | 0.7657           | 0.6654            |
| Top+5%+10%+15%          | 0.5698    | 0.8156    | 0.6927     | 0.3976     | 0.7552           | 0.6495            |
| Top+5%+10%+15%+20%      | 0.6321    | 0.8432    | 0.7377     | 0.4859     | 0.7990           | 0.7055            |

**Table S20.** Performance of logistic regression classifier with continuous strategy.

| <b>Feature sampling</b> | <b>SN</b> | <b>SP</b> | <b>ACC</b> | <b>MCC</b> | <b>Precision</b> | <b>F1 measure</b> |
|-------------------------|-----------|-----------|------------|------------|------------------|-------------------|
| Top 10%                 | 0.8505    | 0.8692    | 0.8599     | 0.7198     | 0.8667           | 0.8585            |
| Top 20%                 | 0.8687    | 0.9628    | 0.9157     | 0.8353     | 0.9588           | 0.9115            |
| Top 30%                 | 0.8687    | 0.9628    | 0.9157     | 0.8353     | 0.9588           | 0.9115            |
| Top 40%                 | 0.8687    | 0.9628    | 0.9157     | 0.8353     | 0.9588           | 0.9115            |

**Table S21.** Performance of multilayer perceptron classifier with discrete strategy.

| <b>Feature sampling</b> | <b>SN</b> | <b>SP</b> | <b>ACC</b> | <b>MCC</b> | <b>Precision</b> | <b>F1 measure</b> |
|-------------------------|-----------|-----------|------------|------------|------------------|-------------------|
| Top (single sampling)   | 0.5732    | 0.7643    | 0.6680     | 0.3438     | 0.7127           | 0.6352            |
| Top+5%                  | 0.7465    | 0.7967    | 0.7716     | 0.5450     | 0.7874           | 0.7655            |
| Top+5%+10%              | 0.7560    | 0.8563    | 0.8062     | 0.6160     | 0.8404           | 0.7955            |
| Top+5%+10%+15%          | 0.7715    | 0.8564    | 0.8139     | 0.6305     | 0.8429           | 0.8052            |
| Top+5%+10%+15%+20%      | 0.7731    | 0.8524    | 0.8127     | 0.6280     | 0.8397           | 0.8046            |

**Table S22.** Performance of multilayer perceptron classifier with continuous strategy.

| <b>Feature sampling</b> | <b>SN</b> | <b>SP</b> | <b>ACC</b> | <b>MCC</b> | <b>Precision</b> | <b>F1 measure</b> |
|-------------------------|-----------|-----------|------------|------------|------------------|-------------------|
| Top 10%                 | 0.8565    | 0.9540    | 0.9052     | 0.8144     | 0.9490           | 0.9004            |
| Top 20%                 | 0.8948    | 0.8284    | 0.8616     | 0.7299     | 0.8503           | 0.8688            |
| Top 30%                 | 0.9528    | 0.3835    | 0.6681     | 0.4058     | 0.6150           | 0.7448            |
| Top 40%                 | 0.9999    | 0.0000    | 0.5000     | -0.0052    | 0.5000           | 0.6666            |

**Table S23.** Performance of RIPPER classifier with discrete strategy.

| <b>Feature sampling</b> | <b>SN</b> | <b>SP</b> | <b>ACC</b> | <b>MCC</b> | <b>Precision</b> | <b>F1 measure</b> |
|-------------------------|-----------|-----------|------------|------------|------------------|-------------------|
| Top (single sampling)   | 0.6606    | 0.7468    | 0.7037     | 0.4090     | 0.7231           | 0.6904            |
| Top+5%                  | 0.6325    | 0.8086    | 0.7205     | 0.4481     | 0.7676           | 0.6934            |
| Top+5%+10%              | 0.6799    | 0.8106    | 0.7452     | 0.4979     | 0.7819           | 0.7242            |
| Top+5%+10%+15%          | 0.6644    | 0.8110    | 0.7377     | 0.4810     | 0.7794           | 0.7170            |
| Top+5%+10%+15%+20%      | 0.7015    | 0.8078    | 0.7546     | 0.5156     | 0.7852           | 0.7382            |

**Table S24.** Performance of RIPPER classifier with continuous strategy.

| <b>Feature sampling</b> | <b>SN</b> | <b>SP</b> | <b>ACC</b> | <b>MCC</b> | <b>Precision</b> | <b>F1 measure</b> |
|-------------------------|-----------|-----------|------------|------------|------------------|-------------------|
| Top 10%                 | 0.8535    | 0.9509    | 0.9022     | 0.8083     | 0.9456           | 0.8972            |
| Top 20%                 | 0.8806    | 0.9625    | 0.9215     | 0.8460     | 0.9591           | 0.9181            |
| Top 30%                 | 0.8632    | 0.9753    | 0.9192     | 0.8440     | 0.9722           | 0.9143            |
| Top 40%                 | 0.8792    | 0.9631    | 0.9212     | 0.8454     | 0.9597           | 0.9176            |
